# Supplementary material
Source: publisher figshare collection journal article supplement (https://acs.figshare.com/ndownloader/files/26181646)
Supplement: Supplementary file 1 [file 26181646]

Supporting information for

# Phage display derived peptide specific to carbamylated protein

Yuhao Ma<sup>a</sup>, Meng Wu<sup>b</sup>, Shuhui Li<sup>b</sup>, Marcello Tonelli<sup>c</sup>, Larry D. Unsworth<sup>a, b,\*</sup>

<sup>a</sup> Department of Biomedical Engineering, University of Alberta, Edmonton, AB, Canada T6G 2V2

<sup>b</sup> Department of Chemical and Materials Engineering, University of Alberta, Edmonton, AB, Canada T6G 1H9

<sup>c</sup> Department of Medicine, University of Calgary, Calgary, Alberta, Canada

Author correspondence: Department of Chemical and Materials Engineering, University of Alberta, Edmonton, AB, Canada T6G 1H9; Email: [lunswort@ualberta.ca](mailto:lunswort@ualberta.ca) (L.D. Unsworth).

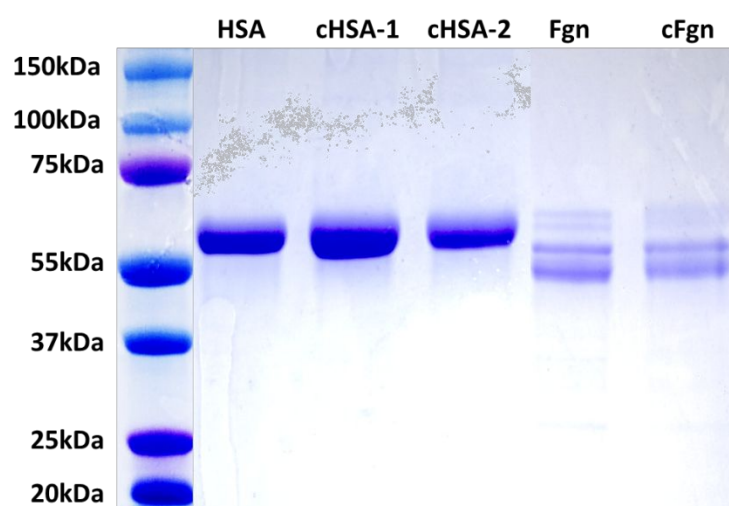

Figure S1. SDS-PAGE bands of native HSA and cHSA (cHSA-2 was used as the representative sample)

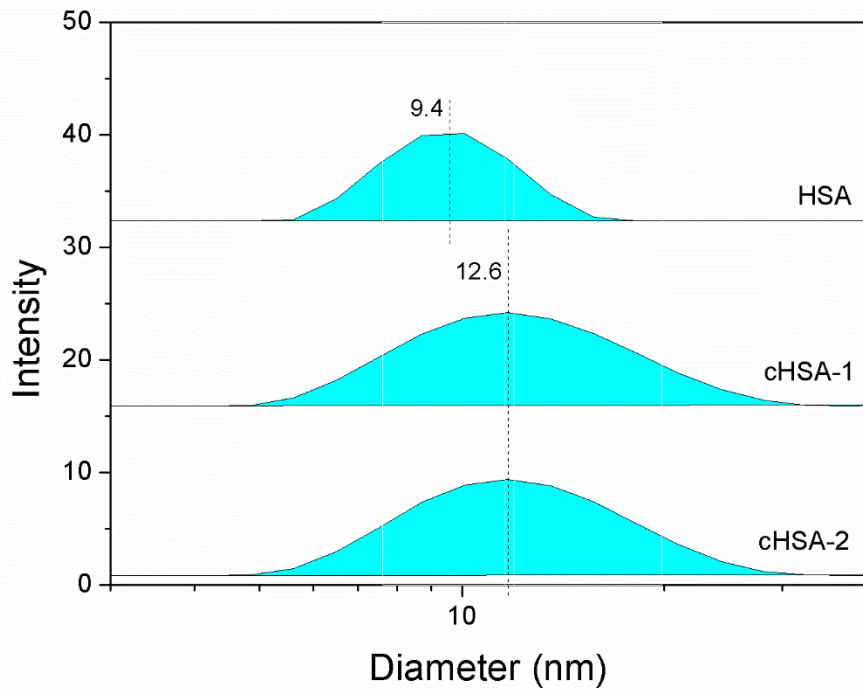

Figure S2. DLS size distribution of HSA, cHSA-1 and cHSA-2 (0.25 mg/ml in 0.1 M PB (pH 7.4), 25 °C, each curve represents average of three measurements)

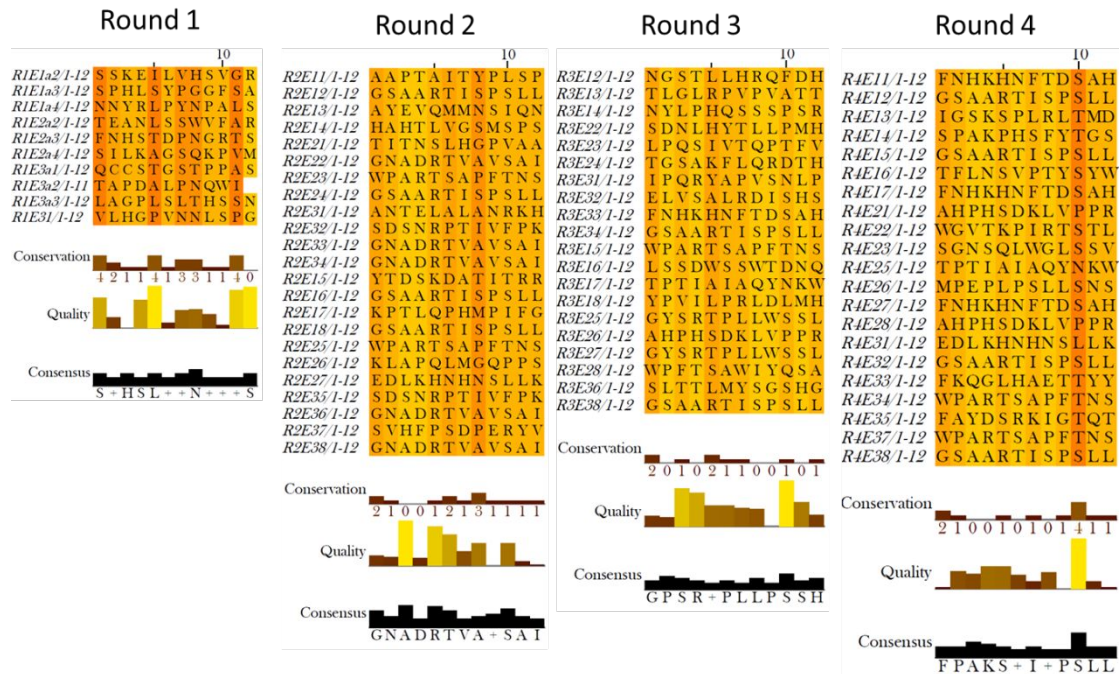

Figure S3. Sequence alignment results of four rounds of biopanning on cHSA-2

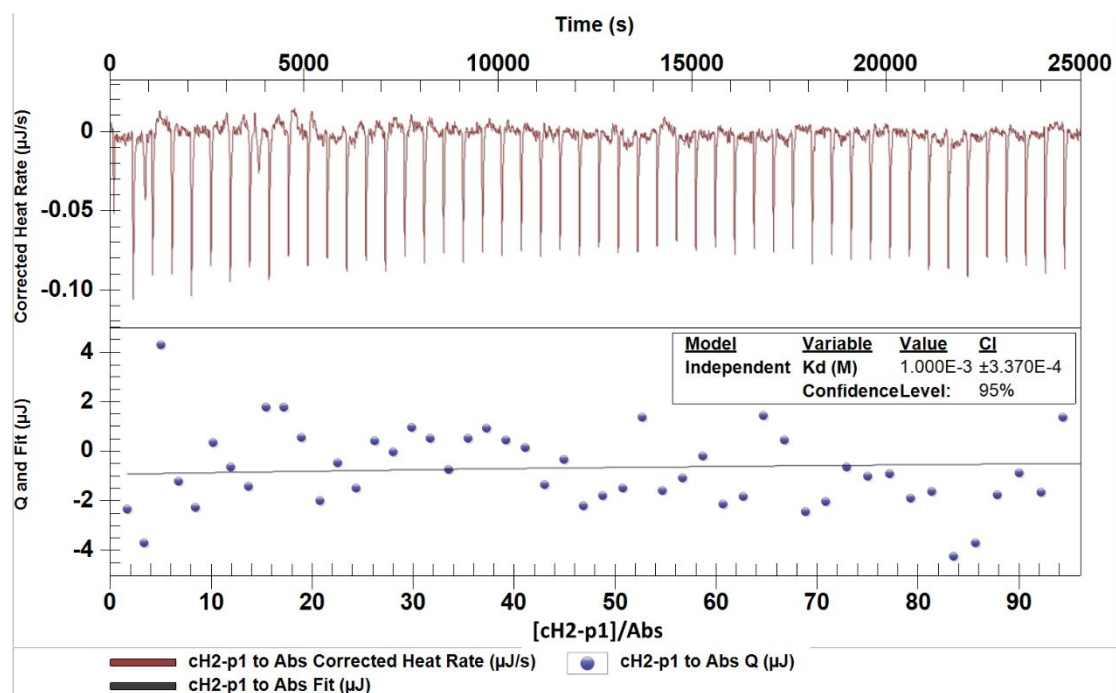

Figure S4. ITC raw titration data and fitting of integrated heat plots of peptide cH2-p1 titration into anti-HcIt

Table S1. Frequency of amino acids included in result of biopanning on cHSA-2

| Amino acid | Frequency (%) |
|------------|---------------|
| S          | 14.8          |
| A          | 9.7           |
| P          | 9.5           |
| L          | 9.5           |
| T          | 8.8           |
| N          | 5.6           |
| R          | 5.1           |
| H          | 5.0           |
| G          | 4.7           |
| I          | 4.2           |
| V          | 4.1           |
| D          | 3.4           |
| K          | 3.2           |
| F          | 3.2           |
| Y          | 2.6           |
| Q          | 2.4           |
| W          | 2.0           |
| M          | 1.2           |
| E          | 1.1           |

|          |            |
|----------|------------|
| <b>C</b> | <b>0.2</b> |
| <b>U</b> | <b>0.0</b> |
